# Supplementary material
Source: PubMed Central journal article supplement (PMC2804365)

## Supplemental figure 1:

D-Serine and D-aspartate do not regulate chimeras which are regulated by the L-isomers (cf. Fig. 2, 3, 5).

Data are  $\pm$  S.E.M, n=2. In many instances the error was within the size of the symbol.

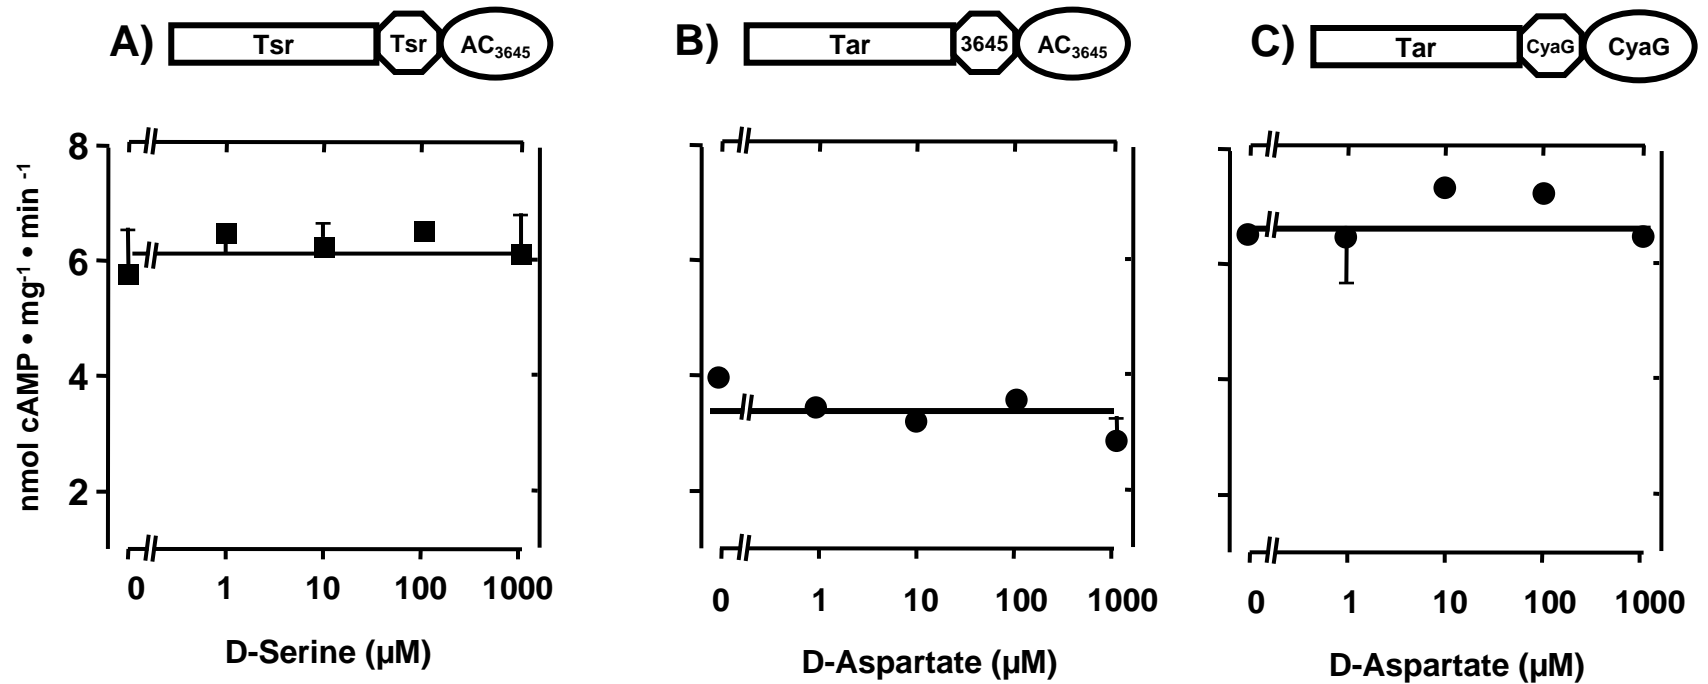

Supplement: supp_M109.051698_jbc.M109.051698-1.pdf [file supp_M109.051698_jbc.M109.051698-1.pdf]
